# Supplementary material for: Degradation of Gadd45 mRNA by nonsense-mediated decay is essential for viability
Source: eLife journal article supplement (doi:10.7554/elife.12876), 2016-03-08
Supplement: supp [file elife_poa_e12876_Supplementary_File_2.xlsx]

## Sheet: Supplementary File 2
Supplementary File 2. PCR primers used in this study.
Primer Name	Sequence	Target Source	Use
Rpl19_1	CTGATCAAGGATGGGCTGAT	3T3 cells	q-PCR
Rpl19_2	GCCGCTATGTACAGACACGA	3T3 cells	q-PCR
Upf1_1	CCAAGCAGCTAATCCTCGTC	3T3 cells	q-PCR
Upf1_2	GCAATGAGCCCTCGTAGAAG	3T3 cells	q-PCR
Gadd45b_1	GCTGTGGAGTGTGACTGCAT	3T3 cells	q-PCR
Gadd45b_2	ACGACTGGATCAGGGTGAAG	3T3 cells	q-PCR
Smg5_1	GTGTCAACGGGGATATGGAC	3T3 cells	q-PCR
Smg5_2	GATGATGAGGTCAGGGTTGG	3T3 cells	q-PCR
Rassf1_1	TGCCTGAACTGCACAATTTC	3T3 cells	q-PCR
Rassf1_2	CTGCCTGTTCTCCTCCTGTC	3T3 cells	q-PCR
CRCP_1	GGTCAAAGGGCATCTGGATA	3T3 cells	q-PCR
CRCP_2	CTCCGCCTCCTAAGTGAGTG	3T3 cells	q-PCR
hRPL_1	ATGTATCACAGCCTGTACCTG	HEK293 cells	q-PCR
hRPL_2	TTCTTGGTCTCTTCCTCCTTG	HEK293 cells	q-PCR
hUPF1_1	GTCACAGCCCTTCTCTCAGG	HEK293 cells	q-PCR
hUPF1_2	TCTCCCTGGTACGTGGAGTC	HEK293 cells	q-PCR
hGADD45A_1	CAGAAGACCGAAAGGATGGA	HEK293 cells	q-PCR
hGADD45A_2	ATCTCTGTCGTCGTCCTCGT	HEK293 cells	q-PCR
Gadd45_3’_2	CCAGCAACTGGTTTCCATTAG	Drosophila	q-PCR
Tra_5’_1	GAACCCAGCATCGAGTGTCAT	Drosophila	q-PCR
Tra_5’_2	GTCGTCCAGCGTTCATTCTCAT	Drosophila	q-PCR
Tra_3’_1	ATACCAAAGGCTACCACGTCCTC	Drosophila	q-PCR
Tra_3’_2	GTAGCCAAATCGCGGAACTC	Drosophila	q-PCR
MAL-A2_5'_1	TTAAGAGCAGTTCCGCCTTTCTT	Drosophila	q-PCR
MAL-A2_5'_2	TCTTGTTTGTGCGAATGATCTGT	Drosophila	q-PCR
MAL-A2_3'_1	AAAGATAGGCCCTGTTTCGACAT	Drosophila	q-PCR
MAL-A2_3'_2	TTGGCATTCAAAGTTCGGTTT	Drosophila	q-PCR
G45_3U_X1_F	GAAGTCTAGATAGGCGGTGTGAGCGGGACAG	Drosophila	Cloning
G45_3U_S1_R	GAAGAGGCCTGTTGATAAAACTGCATAC	Drosophila	Cloning
Act5C__X1_F	GAAGTCTAGATAGGAAGGATCGCTTGTCTG	Drosophila	Cloning
Act5c_S1_R	GAAGAGGCCTGGATCCCCAAGTGTGAGTGTGTGTG	Drosophila	Cloning
Gadd45_F1	GCGCGAAAGATAATGAAAGC	Drosophila	Allele Detection
Gadd45_R1	GCACTGGGCTTTGTGTTTCT	Drosophila	Allele Detection
Gadd45_R3	CCCTCTCCTGCTTCCTGAAT	Drosophila	Allele Detection
DHR78_F3	TGGGGCTTATTCAGAGTTCG	Drosophila	Allele Detection
DHR78_R3	ATTAATGCTGGCCACACTCC	Drosophila	Allele Detection
Adh_F	GTCTGGACACCAGCAAGGAG	Drosophila	Allele Detection
Adh_R	GGTTCAGCTCGATAGCCTTG	Drosophila	Allele Detection
