# Supplementary material for: Degradation of Gadd45 mRNA by nonsense-mediated decay is essential for viability
Source: eLife. 2016 Mar 8;5:e12876. doi: 10.7554/eLife.12876 (PMC4848089; doi:10.7554/eLife.12876)
Supplement: Supplementary file 1. — DOI: http://dx.doi.org/10.7554/eLife.12876.012 [file elife-12876-supp1.xlsx]

## Sheet: Supplementary File 1
Supplementary File 1. Deficiencies used in the deficiency suppressor screen.
Deficiency	DSS
Df_2L_ED3	-0.00730594
Df_2L_ED19	-0.158371
Df_2L_ED21	-0.171946
Df_2L_ED33	0.24
Df_2L_ED49	-0.129524
Df_2L_ED62	-0.219032
Df_2L_ED80	0.0208333
Df_2L_ED87	-0.0593849
Df_2L_ED94	-0.119048
Df_2L_ED104	-0.1875
Df_2L_ED105	-0.132927
Df_2L_ED108	0
Df_2L_ED110	-0.0461538
Df_2L_ED111	-0.020915
Df_2L_ED113	-0.175402
Df_2L_ED115	-0.0131868
Df_2L_ED116	-0.167989
Df_2L_ED117	0.101852
Df_2L_ED120	0.203526
Df_2L_ED122	-0.112573
Df_2L_ED123	0.02
Df_2L_ED124	-0.0584416
Df_2L_ED125	-0.0114469
Df_2L_ED134	0.0221445
Df_2L_ED136	-0.0206784
Df_2L_ED206	0.0145349
Df_2L_ED216	0.157706
Df_2L_ED234	-0.198519
Df_2L_ED243	-0.173259
Df_2L_ED247	-0.173333
Df_2L_ED250	-0.659574
Df_2L_ED256	-0.316406
Df_2L_ED270	0.0445748
Df_2L_ED279	-0.0435772
Df_2L_ED280	0.0441426
Df_2L_ED284	0.107843
Df_2L_ED285	-0.199134
Df_2L_ED292	-0.308333
Df_2L_ED299	-0.108553
Df_2L_ED320	0.211321
Df_2L_ED330	-0.181053
Df_2L_ED334	-0.0377358
Df_2L_ED343	-0.480952
Df_2L_ED347	-0.120066
Df_2L_ED353	-0.0608108
Df_2L_ED354	-0.15122
Df_2L_ED369	0.0463768
Df_2L_ED371	0.0142857
Df_2L_ED375	0.0690909
Df_2L_ED378	-0.955556
Df_2L_ED384	-0.499649
Df_2L_ED385	-0.384444
Df_2L_ED438	0.250896
Df_2L_ED440	0.0673077
Df_2L_ED475	-0.0833333
Df_2L_ED478	0.0518519
Df_2L_ED479	-0.304702
Df_2L_ED482	-0.0976431
Df_2L_ED483	-0.39011
Df_2L_ED489	-0.0666667
Df_2L_ED496	-0.137255
Df_2L_ED499	-0.340336
Df_2L_ED501	-0.0394872
Df_2L_ED502	-0.131336
Df_2L_ED508	-0.196078
Df_2L_ED548	-0.106469
Df_2L_ED578	-0.0579787
Df_2L_ED611	-0.0714286
Df_2L_ED623	-0.511111
Df_2L_ED629	-0.19195
Df_2L_ED630	-0.176296
Df_2L_ED632	0.342657
Df_2L_ED647	-0.31453
Df_2L_ED659	-0.164474
Df_2L_ED673	-0.037037
Df_2L_ED677	-0.263718
Df_2L_ED678	-0.33619
Df_2L_ED680	-0.208291
Df_2L_ED684	-0.221719
Df_2L_ED690	-0.334049
Df_2L_ED692	-0.023088
Df_2L_ED694	-0.413462
Df_2L_ED695	0.134831
Df_2L_ED697	0.181818
Df_2L_ED700	0.287668
Df_2L_ED701	-0.0131666
Df_2L_ED729	0.180612
Df_2L_ED737	0.0793269
Df_2L_ED746	0.0645161
Df_2L_ED748	-0.179487
Df_2L_ED758	-0.11796
Df_2L_ED760	-0.1
Df_2L_ED761	-0.358788
Df_2L_ED769	-0.0740741
Df_2L_ED771	-0.14375
Df_2L_ED773	-0.103175
Df_2L_ED774	0.124228
Df_2L_ED775	-0.274545
Df_2L_ED776	0.031746
Df_2L_ED777	-0.444444
Df_2L_ED778	-0.02331
Df_2L_ED779	-0.366207
Df_2L_ED780	-0.120069
Df_2L_ED784	-0.232143
Df_2L_ED791	-0.0505051
Df_2L_ED793	-0.391892
Df_2L_ED796	-0.244565
Df_2L_ED800	-0.0439189
Df_2L_ED929	-0.0488263
Df_2L_ED1000	-0.0544895
Df_2L_ED1050	-0.122094
Df_2L_ED1054	-0.451613
Df_2L_ED1056	-0.100529
Df_2L_ED1081	0.00979192
Df_2L_ED1092	0.151474
Df_2L_ED1102	0.098103
Df_2L_ED1109	-0.029242
Df_2L_ED1143	-0.2
Df_2L_ED1158	0.186907
Df_2L_ED1161	0.0220588
Df_2L_ED1175	0
Df_2L_ED1183	-0.0714286
Df_2L_ED1186	-0.115789
Df_2L_ED1195	0.24
Df_2L_ED1196	-0.0927273
Df_2L_ED1198	-0.252818
Df_2L_ED1200	0.0111111
Df_2L_ED1202	-0.0636801
Df_2L_ED1203	0.04
Df_2L_ED1226	-0.16688
Df_2L_ED1231	-0.0869565
Df_2L_ED1238	-0.260943
Df_2L_ED1242	-0.0211161
Df_2L_ED1245	-0.263158
Df_2L_ED1272	-0.0524138
Df_2L_ED1303	-0.0941764
Df_2L_ED1305	0.00108225
Df_2L_ED1315	-0.794118
Df_2L_ED1317	-0.152555
Df_2L_ED1375	-0.292708
Df_2L_ED1378	-0.227477
Df_2L_ED1382	-0.00394011
Df_2L_ED1384	-0.432234
Df_2L_ED1451	0.181818
Df_2L_ED1455	-0.919355
Df_2L_ED1462	-0.0844444
Df_2L_ED1466	0
Df_2L_ED1473	0.047619
Df_2L_ED4330	0.0545809
Df_2L_ED4559	-0.109231
Df_2L_ED4651	-0.341101
Df_2L_ED5878	-0.0671543
Df_2L_ED6569	-0.26501
Df_2L_ED7007	0.00666667
Df_2L_ED7666	-0.111111
Df_2L_ED7762	-0.065407
Df_2L_ED7853	-0.137658
Df_2L_ED8142	-0.015444
Df_2L_ED8368	-0.108095
Df_2L_ED8386	-0.0242656
Df_2L_ED12487	-0.238462
Df_2L_ED13216	-0.301552
Df_2R_ED1	0.194444
Df_2R_ED1482	0.214035
Df_2R_ED1484	0.0190476
Df_2R_ED1552	-0.325
Df_2R_ED1612	0.0225282
Df_2R_ED1618	-0.0680359
Df_2R_ED1673	0.145577
Df_2R_ED1715	0.0741293
Df_2R_ED1725	-0.0275
Df_2R_ED1735	-0.281718
Df_2R_ED1742	-0.0398936
Df_2R_ED1791	-0.242424
Df_2R_ED2076	-0.0360902
Df_2R_ED2155	-0.414483
Df_2R_ED2219	-0.110924
Df_2R_ED2222	-0.137374
Df_2R_ED2247	-0.209865
Df_2R_ED2308	0.024918
Df_2R_ED2311	-0.261538
Df_2R_ED2354	0.237037
Df_2R_ED2423	-0.0824176
Df_2R_ED2426	-0.112528
Df_2R_ED2436	-0.16
Df_2R_ED2457	0.0147059
Df_2R_ED2747	-0.759582
Df_2R_ED2751	-0.177375
Df_2R_ED3181	-0.39375
Df_2R_ED3610	-0.287751
Df_2R_ED3636	-0.142857
Df_2R_ED3683	-0.178469
Df_2R_ED3728	-0.312169
Df_2R_ED3791	-0.971014
Df_2R_ED3921	-0.2
Df_2R_ED3923	-0.416525
Df_2R_ED3943	-0.300654
Df_2R_ED3952	0.00929054
Df_2R_ED4061	-0.0178571
Df_2R_ED4065	-0.047619
Df_2R_ED4071	-0.219907
Df_3L_ED201	-0.241758
Df_3L_ED202	-0.341991
Df_3L_ED208	-0.278752
Df_3L_ED210	-0.0735786
Df_3L_ED211	-0.0549199
Df_3L_ED215	-0.0208333
Df_3L_ED217	0.0729167
Df_3L_ED218	-0.103448
Df_3L_ED220	-0.269231
Df_3L_ED223	-0.192308
Df_3L_ED224	-0.171429
Df_3L_ED225	-0.0714286
Df_3L_ED228	-0.350267
Df_3L_ED229	-0.214286
Df_3L_ED230	-0.0632184
Df_3L_ED231	0.0818533
Df_3L_ED4079	-0.0891892
Df_3L_ED4177	-0.300799
Df_3L_ED4196	-0.8
Df_3L_ED4238	-0.257143
Df_3L_ED4256	0.0623886
Df_3L_ED4284	0.0691244
Df_3L_ED4287	-0.147661
Df_3L_ED4288	-0.00189394
Df_3L_ED4293	0.0730435
Df_3L_ED4341	-0.220741
Df_3L_ED4342	-0.192381
Df_3L_ED4408	-0.35
Df_3L_ED4413	-0.0333333
Df_3L_ED4414	-0.0438596
Df_3L_ED4415	-0.444444
Df_3L_ED4416	-1
Df_3L_ED4421	-0.346154
Df_3L_ED4457	-0.0384615
Df_3L_ED4470	-0.135526
Df_3L_ED4475	-0.228369
Df_3L_ED4483	-0.269608
Df_3L_ED4486	-0.231061
Df_3L_ED4502	-0.0656566
Df_3L_ED4515	0.0118467
Df_3L_ED4528	0.0473856
Df_3L_ED4529	-0.323529
Df_3L_ED4534	-0.0117302
Df_3L_ED4536	-0.204969
Df_3L_ED4543	-0.231746
Df_3L_ED4606	-0.5
Df_3L_ED4674	-0.0769231
Df_3L_ED4685	0.094697
Df_3L_ED4782	-0.031746
Df_3L_ED4786	-0.00757576
Df_3L_ED4789	-0.0263736
Df_3L_ED4799	0.052381
Df_3L_ED4858	-0.85
Df_3L_ED4978	0.075188
Df_3L_ED5017	-0.164855
Df_3R_ED2	0.223602
Df_3R_ED5020	-0.0210728
Df_3R_ED5021	-0.0625
Df_3R_ED5046	-0.32619
Df_3R_ED5066	-0.42
Df_3R_ED5071	-0.428571
Df_3R_ED5092	0.00641026
Df_3R_ED5095	-0.314685
Df_3R_ED5100	-0.21875
Df_3R_ED5138	-0.020979
Df_3R_ED5142	-0.146104
Df_3R_ED5147	-0.0456389
Df_3R_ED5156	-0.0507246
Df_3R_ED5177	-0.17893
Df_3R_ED5187	-0.0906817
Df_3R_ED5196	-0.0758808
Df_3R_ED5197	-0.228745
Df_3R_ED5220	-0.00459242
Df_3R_ED5221	0.146341
Df_3R_ED5223	-0.182726
Df_3R_ED5230	0.0369318
Df_3R_ED5296	-0.333333
Df_3R_ED5301	-0.014652
Df_3R_ED5327	-0.0882353
Df_3R_ED5330	-0.545455
Df_3R_ED5331	-0.108374
Df_3R_ED5339	-0.0779221
Df_3R_ED5416	-0.214976
Df_3R_ED5428	-0.282051
Df_3R_ED5429	-0.631579
Df_3R_ED5438	-0.226815
Df_3R_ED5454	-0.110078
Df_3R_ED5472	-0.121951
Df_3R_ED5474	-0.275862
Df_3R_ED5495	-0.0761905
Df_3R_ED5506	0.0190217
Df_3R_ED5514	-0.512821
Df_3R_ED5516	0.0185185
Df_3R_ED5518	0.296296
Df_3R_ED5554	-0.0466667
Df_3R_ED5558	0.0992063
Df_3R_ED5573	0.28
Df_3R_ED5577	-0.0701754
Df_3R_ED5591	-0.22807
Df_3R_ED5608	0.0653358
Df_3R_ED5610	-0.0271226
Df_3R_ED5612	-0.25
Df_3R_ED5613	-0.193548
Df_3R_ED5622	-0.0416667
Df_3R_ED5623	-1
Df_3R_ED5634	-0.113636
Df_3R_ED5642	-0.116279
Df_3R_ED5644	-0.295238
Df_3R_ED5657	-0.391304
Df_3R_ED5660	0.109848
Df_3R_ED5662	0.177778
Df_3R_ED5688	-0.257919
Df_3R_ED5780	-0.05
Df_3R_ED5781	-0.628571
Df_3R_ED5785	0.0673401
Df_3R_ED5797	-0.120301
Df_3R_ED5815	-1
Df_3R_ED5911	0.337284
Df_3R_ED5938	0.0102639
Df_3R_ED5942	0.166667
Df_3R_ED6025	-0.150246
Df_3R_ED6027	-0.15625
Df_3R_ED6052	-0.117458
Df_3R_ED6058	-0.204062
Df_3R_ED6076	-0.217105
Df_3R_ED6085	0
Df_3R_ED6090	-0.285714
Df_3R_ED6091	-0.0527027
Df_3R_ED6093	0.375
Df_3R_ED6096	-0.227273
Df_3R_ED6103	-0.0789037
Df_3R_ED6105	-0.171815
Df_3R_ED6116	0.135256
Df_3R_ED6119	-0.377778
Df_3R_ED6144	0.0010582
Df_3R_ED6155	-0.6
Df_3R_ED6187	-0.836802
Df_3R_ED6220	-0.356667
Df_3R_ED6232	-0.220238
Df_3R_ED6235	-0.16643
Df_3R_ED6237	0.213965
Df_3R_ED6242	0.0333333
Df_3R_ED6255	-0.295195
Df_3R_ED6265	-0.220238
Df_3R_ED6290	-0.595238
Df_3R_ED6310	-0.118919
Df_3R_ED6316	-0.411765
Df_3R_ED6332	-0.326572
Df_3R_ED6346	-0.142295
Df_3R_ED6361	-0.388615
Df_3R_ED6362	-0.223881
Df_3R_ED7665	-0.0833333
Df_3R_ED10257	-0.223188
Df_3R_ED10549	-0.113488
Df_3R_ED10556	0.136824
Df_3R_ED10557	0.064
Df_3R_ED10561	-0.113971
Df_3R_ED10564	0.075
Df_3R_ED10566	-0.201754
Df_3R_ED10639	-0.191176
Df_3R_ED10642	-0.221429
Df_3R_ED10809	-0.0460688
Df_3R_ED10811	-0.0238095
Df_3R_ED10820	-0.162471
Df_3R_ED10845	-0.489796
Df_3R_ED10893	-0.237537
Df_3R_ED10894	-0.44375
Df_3R_ED10951	-0.266667
Df_3R_ED10953	-0.2
Df_3R_ED10961	0.194444
Df_3R_ED10966	-0.0974359
Df_3R_ED50003	-0.169655
Df_4_ED6364	-0.733333
Df_4_ED6369	-0.890909
Df_4_ED6380	-0.774194
