# Supplementary figures and images for: Degradation of Gadd45 mRNA by nonsense-mediated decay is essential for viability
Source: eLife journal article supplement (doi:10.7554/elife.12876), 2016-03-08

Figure 1-figure supplement 1

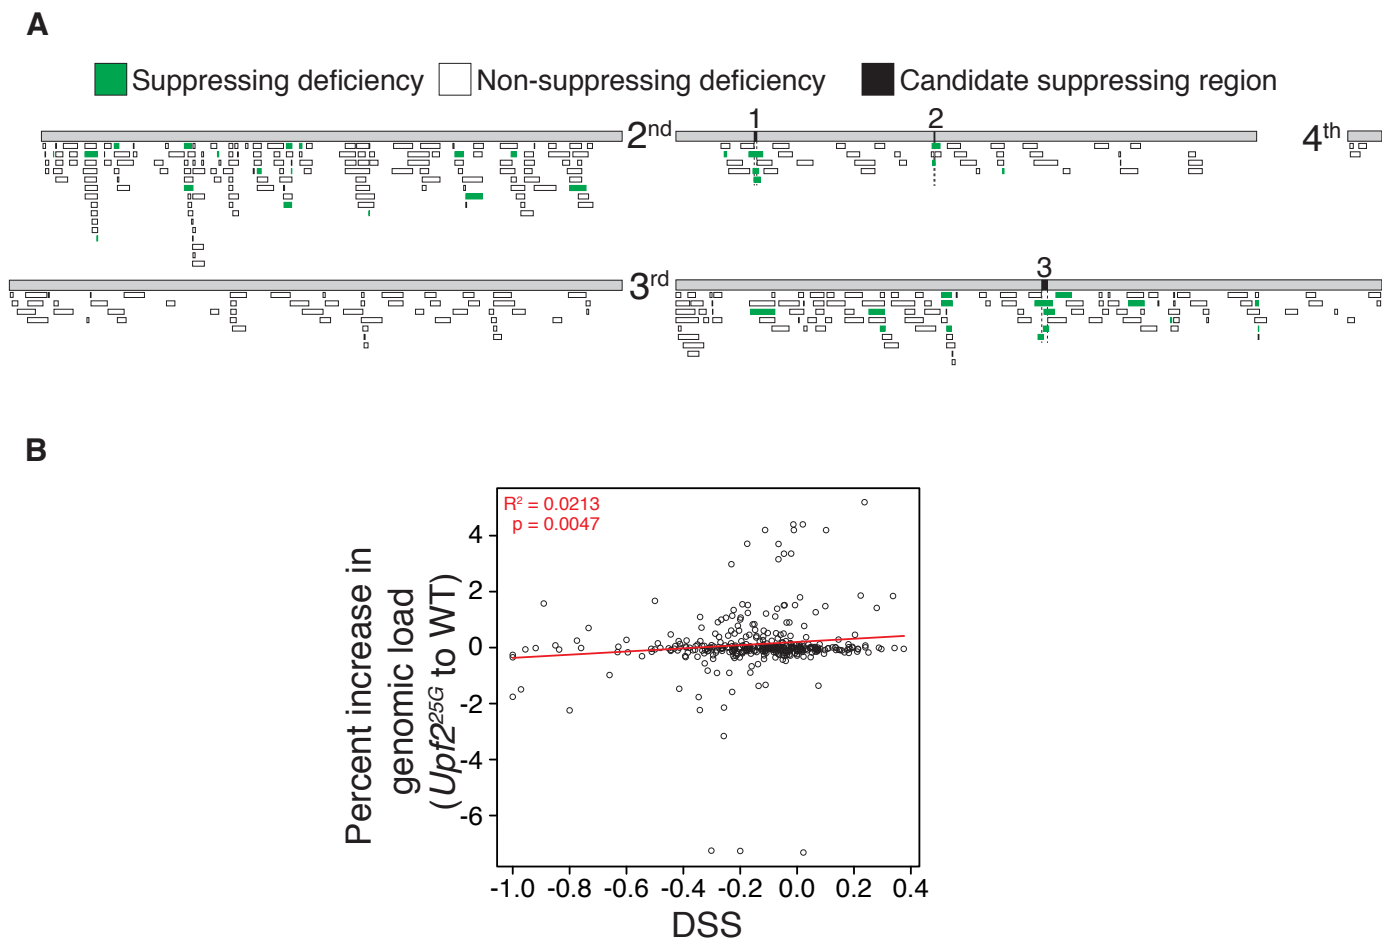

Supplement: supp [file elife-12876-supp-v1.zip]

Figure 1-figure supplement 2

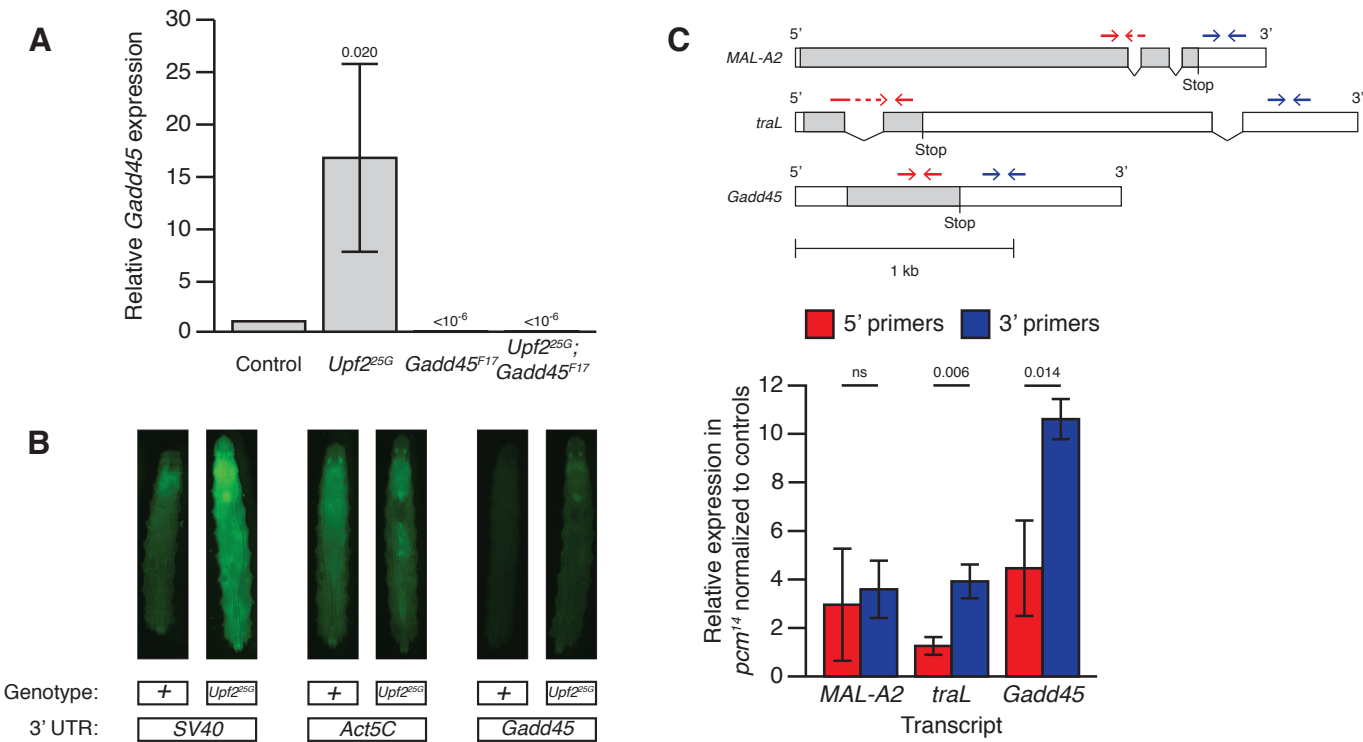

Supplement: supp [file elife-12876-supp-v1.zip]

Figure 2-figure supplement 1

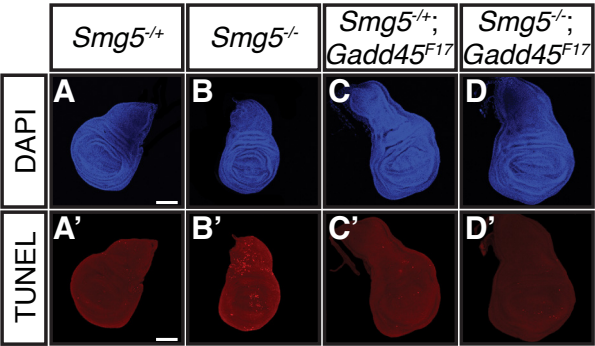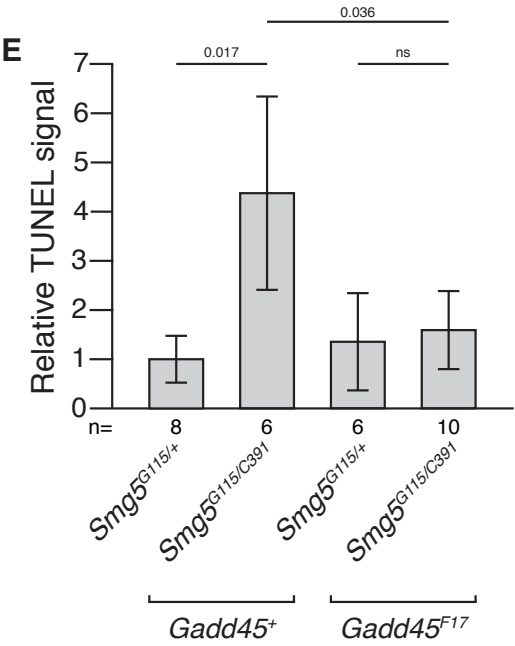

Supplement: supp [file elife-12876-supp-v1.zip]

Figure 1-figure supplement 4

**A**

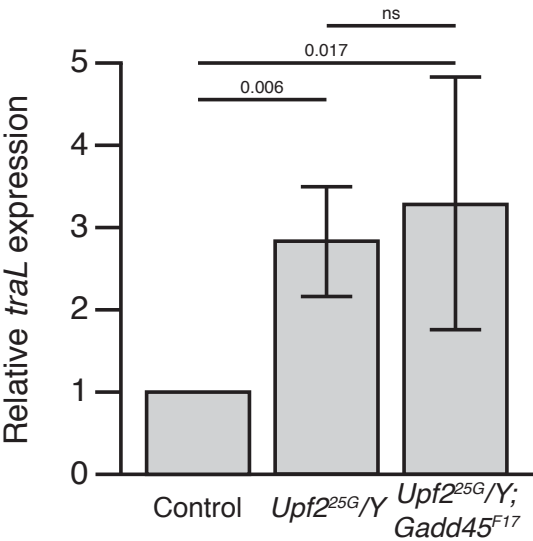

**B**

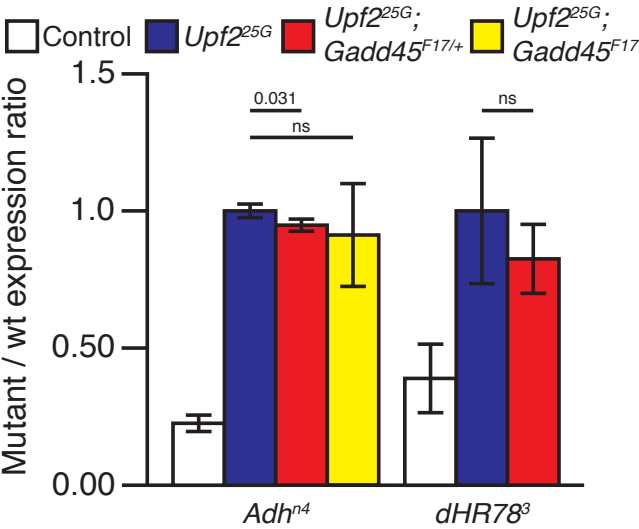

Supplement: supp [file elife-12876-supp-v1.zip]

Figure 3-figure supplement 1

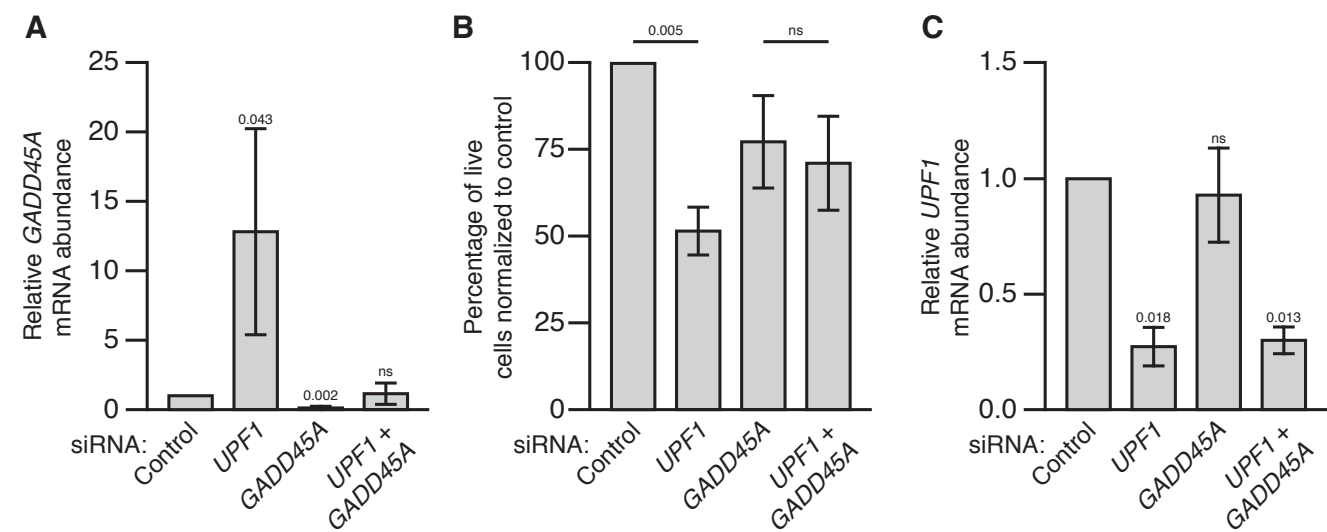

Supplement: supp [file elife-12876-supp-v1.zip]

Figure 1-figure supplement 2

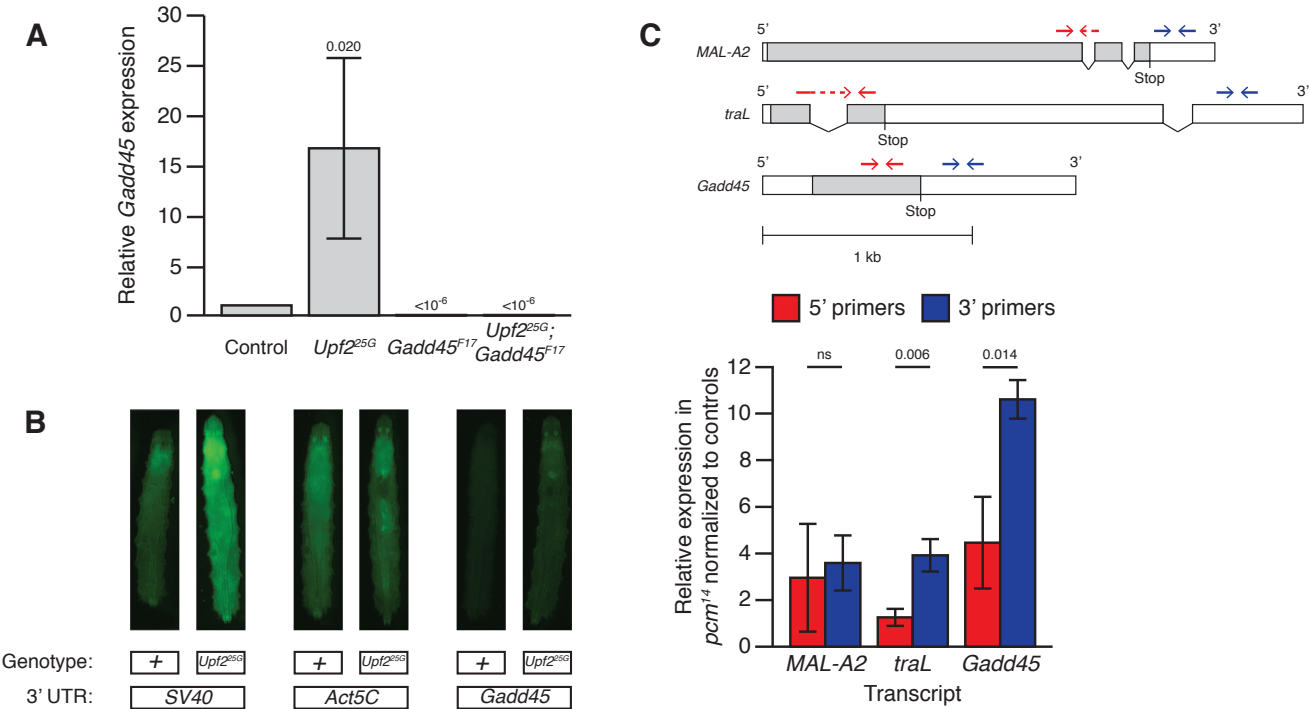

Supplement: supp [file elife-12876-supp-v1.zip]
